# Supplementary material
Source: PubMed Central journal article supplement (PMC1805580)
Supplement: pnas_0611533104_1.pdf [file pnas_0611533104_1.pdf]

**Table 2. Correlations between the expression of PD-Ls or tumor-infiltrating CD8<sup>+</sup> lymphocytes and clinicopathological characteristics in ovarian cancer (n = 70)**

| Variable           | n  | PD-L1 expression |      |       | PD-L2 expression |      |       | Intraepithelial CD8 <sup>+</sup> TIL |          |       | Stromal CD8 <sup>+</sup> TIL |          |       |
|--------------------|----|------------------|------|-------|------------------|------|-------|--------------------------------------|----------|-------|------------------------------|----------|-------|
|                    |    | Low              | High | P     | Low              | High | P     | Negative                             | Positive | P     | Negative                     | Positive | P     |
| Age                |    |                  |      | 0.196 |                  |      | 0.955 |                                      |          | 0.509 |                              |          | 0.900 |
| <55                | 32 | 13               | 19   |       | 20               | 12   |       | 16                                   | 16       |       | 19                           | 13       |       |
| ≥55                | 38 | 9                | 29   |       | 24               | 14   |       | 22                                   | 16       |       | 22                           | 16       |       |
| Stage              |    |                  |      | 0.571 |                  |      | 0.521 |                                      |          | 0.305 |                              |          | 0.420 |
| I                  | 27 | 11               | 16   |       | 17               | 10   |       | 11                                   | 16       |       | 16                           | 11       |       |
| II                 | 4  | 1                | 3    |       | 3                | 1    |       | 4                                    | 0        |       | 4                            | 0        |       |
| III                | 26 | 6                | 20   |       | 14               | 12   |       | 16                                   | 10       |       | 12                           | 14       |       |
| IV                 | 13 | 4                | 9    |       | 10               | 3    |       | 7                                    | 6        |       | 9                            | 4        |       |
| Histology          |    |                  |      | 0.167 |                  |      | 0.513 |                                      |          | 0.649 |                              |          | 0.150 |
| Serous             | 28 | 7                | 21   |       | 16               | 12   |       | 15                                   | 13       |       | 15                           | 13       |       |
| Clear cell         | 22 | 8                | 14   |       | 13               | 9    |       | 13                                   | 9        |       | 13                           | 9        |       |
| Endometrioid       | 11 | 2                | 9    |       | 7                | 4    |       | 7                                    | 4        |       | 9                            | 2        |       |
| Mucinous           | 2  | 2                | 0    |       | 2                | 0    |       | 1                                    | 1        |       | 2                            | 0        |       |
| others             | 7  | 3                | 4    |       | 6                | 1    |       | 2                                    | 5        |       | 2                            | 5        |       |
| LN metastasis      |    |                  |      | 0.288 |                  |      | 0.266 |                                      |          | 0.401 |                              |          | 0.856 |
| Positive           | 14 | 3                | 11   |       | 7                | 7    |       | 9                                    | 5        |       | 8                            | 6        |       |
| Negative           | 56 | 19               | 37   |       | 37               | 19   |       | 29                                   | 27       |       | 33                           | 23       |       |
| Distant metastasis |    |                  |      | 0.788 |                  |      | 0.201 |                                      |          | 0.972 |                              |          | 0.294 |
| Positive           | 13 | 4                | 9    |       | 10               | 3    |       | 7                                    | 6        |       | 9                            | 4        |       |
| Negative           | 57 | 18               | 39   |       | 34               | 23   |       | 31                                   | 26       |       | 32                           | 25       |       |
| Residual tumor     |    |                  |      | 0.822 |                  |      | 0.666 |                                      |          | 0.402 |                              |          | 0.491 |
| Optimal            | 49 | 15               | 34   |       | 30               | 19   |       | 25                                   | 24       |       | 30                           | 19       |       |
| Suboptimal         | 21 | 7                | 14   |       | 14               | 7    |       | 13                                   | 8        |       | 11                           | 10       |       |
| Chemotherapy       |    |                  |      | 0.155 |                  |      | 0.451 |                                      |          | 0.294 |                              |          | 0.939 |
| No paclitaxel      | 39 | 15               | 24   |       | 23               | 16   |       | 19                                   | 20       |       | 23                           | 16       |       |
| Paclitaxel         | 31 | 7                | 24   |       | 21               | 10   |       | 19                                   | 12       |       | 18                           | 13       |       |
