# Supplementary material
Source: PubMed Central journal article supplement (PMC1805580)
Supplement: pnas_0611533104_2.pdf [file pnas_0611533104_2.pdf]

**Table 3. Univariate analysis showing factors including PD-L1 expression and tumor-infiltrating CD8<sup>+</sup> lymphocytes on the cancer-specific death of the patients with ovarian cancer (n = 70)**

| Variable                             | n  | Overall survival,     |         | Progression-free survival, |         |
|--------------------------------------|----|-----------------------|---------|----------------------------|---------|
|                                      |    | univariate risk ratio | P value | univariate risk ratio      | P value |
| PD-L1 expression                     |    |                       | 0.016   |                            | 0.038   |
| Low                                  | 22 | 1                     |         | 1                          |         |
| High                                 | 48 | 3.40 ( 1.18 – 9.80 )  |         | 2.32 ( 1.02 – 5.32 )       |         |
| PD-L2 expression                     |    |                       | 0.111   |                            | 0.685   |
| Low                                  | 44 | 1                     |         | 1                          |         |
| High                                 | 26 | 1.81 ( 0.87 – 3.80 )  |         | 1.15 ( 0.59 – 2.25 )       |         |
| Intraepithelial CD8 <sup>+</sup> TIL |    |                       | <0.001  |                            | <0.001  |
| Negative                             | 38 | 6.59 ( 2.47 – 17.59 ) |         | 3.67 ( 1.72 – 7.87 )       |         |
| Positive                             | 32 | 1                     |         | 1                          |         |
| Stromal CD8 <sup>+</sup> TIL         |    |                       | 0.616   |                            | 0.320   |
| Negative                             | 41 | 1                     |         | 1                          |         |
| Positive                             | 29 | 1.21 ( 0.580 – 2.51 ) |         | 1.39 ( 0.72 – 2.68 )       |         |
| Tumor status                         |    |                       | <0.001  |                            | 0.038   |
| pT1 + pT2                            | 31 | 1                     |         | 1                          |         |
| pT3                                  | 39 | 7.90 ( 2.73 – 22.83 ) |         | 2.32 ( 1.02 – 5.32 )       |         |
| LN metastasis                        |    |                       | 0.003   |                            | <0.001  |
| pN0                                  | 56 | 1                     |         | 1                          |         |
| pN1                                  | 14 | 3.24 ( 1.50 – 7.00 )  |         | 6.39 ( 2.63 – 15.53 )      |         |
| Distant metastasis                   |    |                       | 0.047   |                            | 0.001   |
| pM0                                  | 57 | 1                     |         | 1                          |         |
| pM1                                  | 13 | 2.28 ( 1.01 – 5.16 )  |         | 3.27 ( 1.59 – 6.75 )       |         |
| Residual tumor                       |    |                       | <0.001  |                            | <0.001  |
| Optimal                              | 49 | 1                     |         | 1                          |         |
| Suboptimal                           | 21 | 4.54 ( 2.17 – 9.50 )  |         | 4.68 ( 2.38 – 9.23 )       |         |
| Histology                            |    |                       | 0.477   |                            | 0.103   |
| Clear cell type                      | 22 | 1.33 ( 0.59 – 3.02 )  |         | 1.93 ( 0.88 – 2.70 )       |         |
| Non-clear type                       | 48 | 1                     |         | 1                          |         |
| Chemotherapy                         |    |                       | 0.122   |                            | 0.598   |
| Paclitaxel                           | 31 | 1                     |         | 1                          |         |
| No paclitaxel                        | 39 | 1.79 ( 0.86 – 3.77 )  |         | 1.30 ( 0.67 – 2.92 )       |         |

Numbers in parentheses represent 95% C.I.
